# Supplementary material for: PIMD: An Integrative Approach for Drug Repositioning Using Multiple Characterization Fusion
Source: PubMed Central journal article supplement (PMC8377380; doi:10.1016/j.gpb.2018.10.012), 2020-10-17

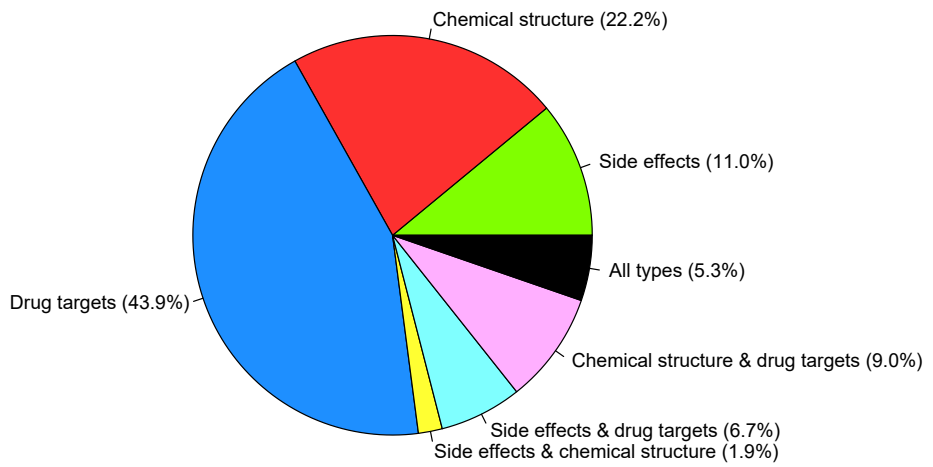

Supplement: mmc3.pdf [file mmc3.pdf]
