# Supplementary material for: PIMD: An Integrative Approach for Drug Repositioning Using Multiple Characterization Fusion
Source: PubMed Central journal article supplement (PMC8377380; doi:10.1016/j.gpb.2018.10.012), 2020-10-17

A Deviation of physicochemical features (for all drugs in DrugBank)

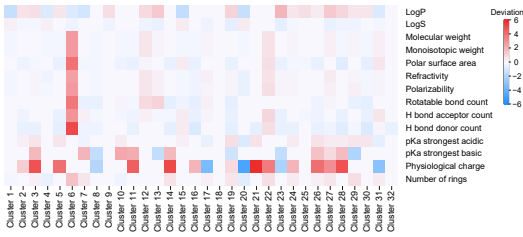

B Deviation of physicochemical features (for all 593 drugs in IDSN)

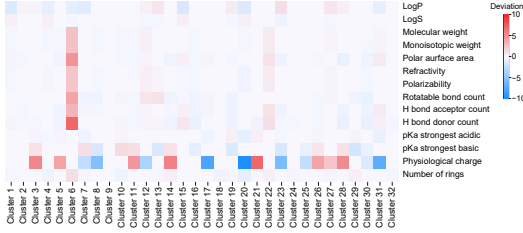

D GO cellular component enrichment

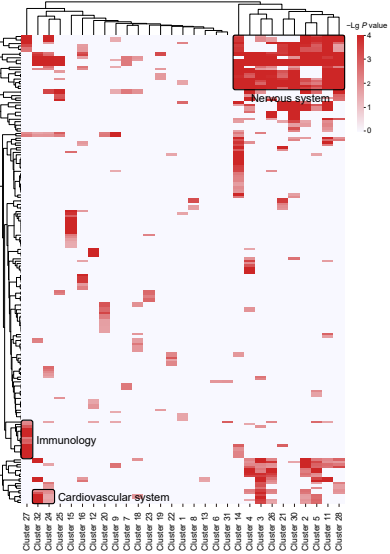

E GO molecular function enrichment

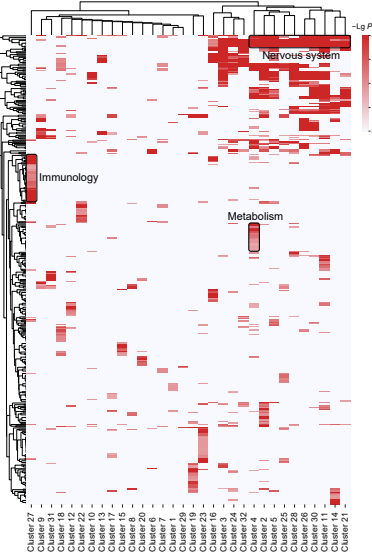

C ADMET property enrichment

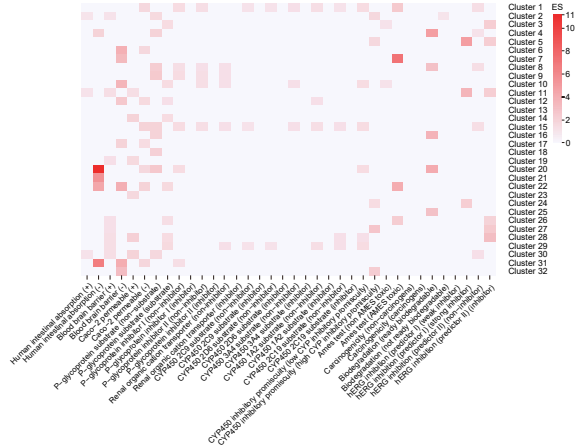

F Target class enrichment

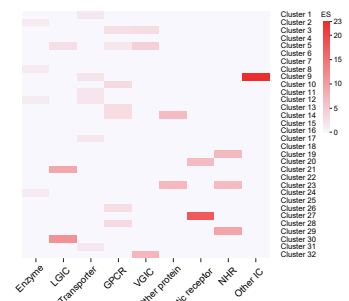

G Deviation of chemical descriptors (for all drugs in DrugBank)

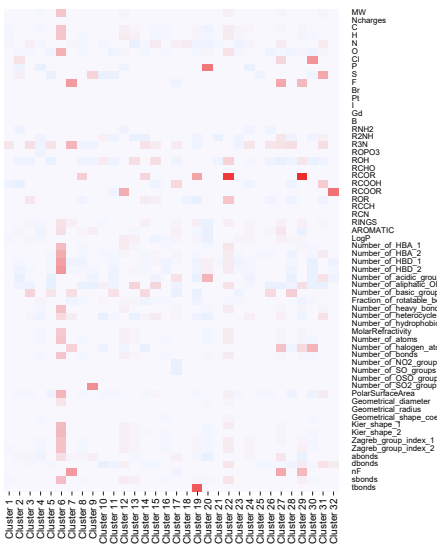

H Deviation of chemical descriptors (for all 593 drugs in IDSN)

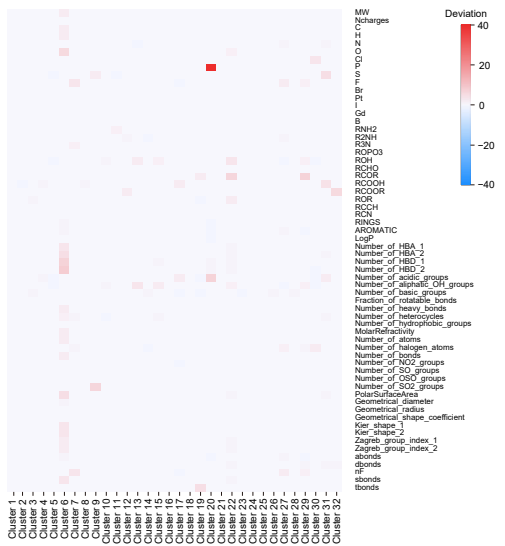

Supplement: mmc4.pdf [file mmc4.pdf]
