# Supplementary material for: PIMD: An Integrative Approach for Drug Repositioning Using Multiple Characterization Fusion
Source: PubMed Central journal article supplement (PMC8377380; doi:10.1016/j.gpb.2018.10.012), 2020-10-17

### A Dot plot of KEGG pathway enrichment

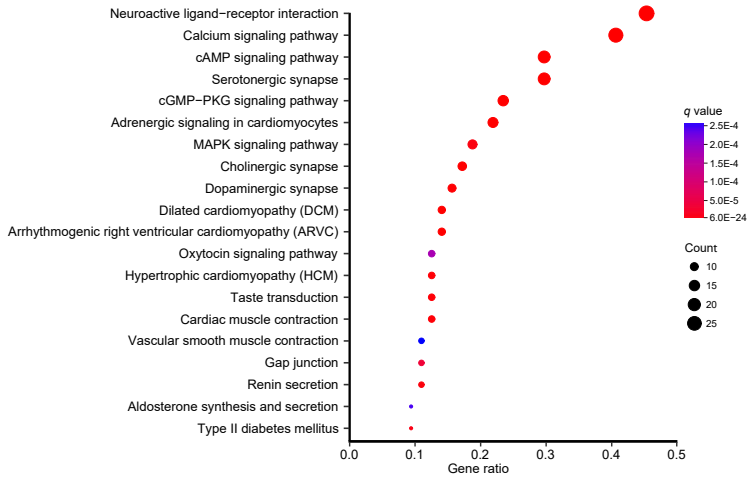

### B Dot plot of GO biological process enrichment

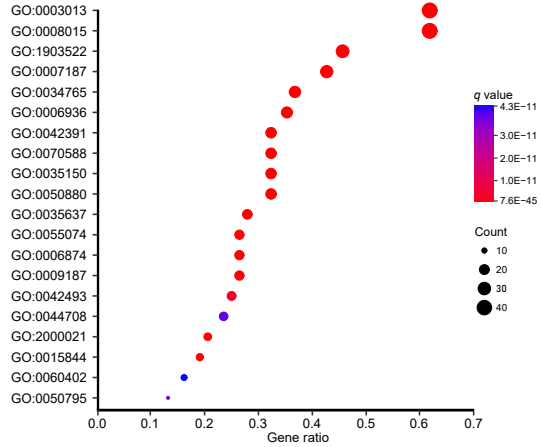

### C Dot plot of GO cellular component enrichment

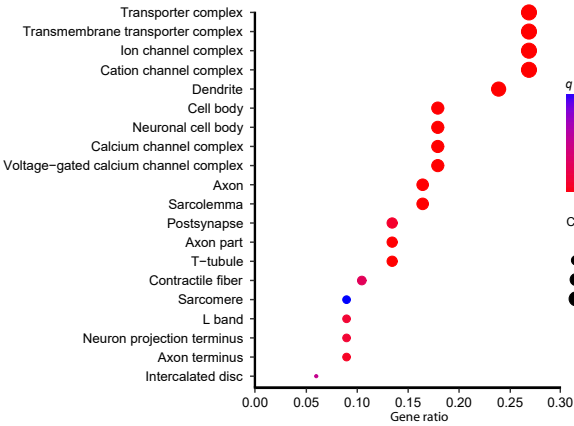

### D Dot plot of GO molecular function enrichment

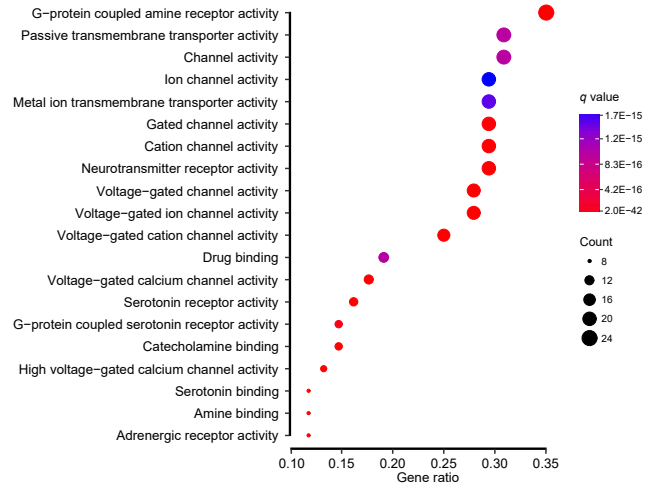

### E ChEBI Ontology enrichment (structure term)

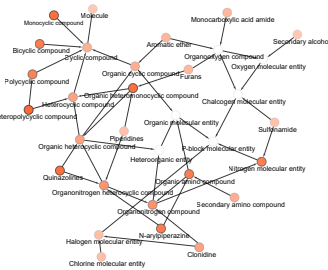

### F ChEBI Ontology enrichment (role term)

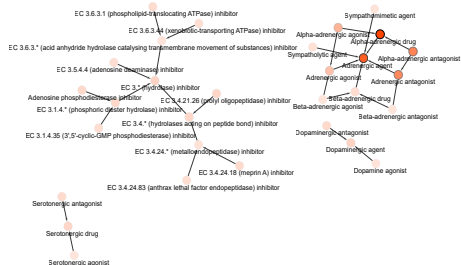

### G Physicochemical feature deviation of drugs in Cluster 3

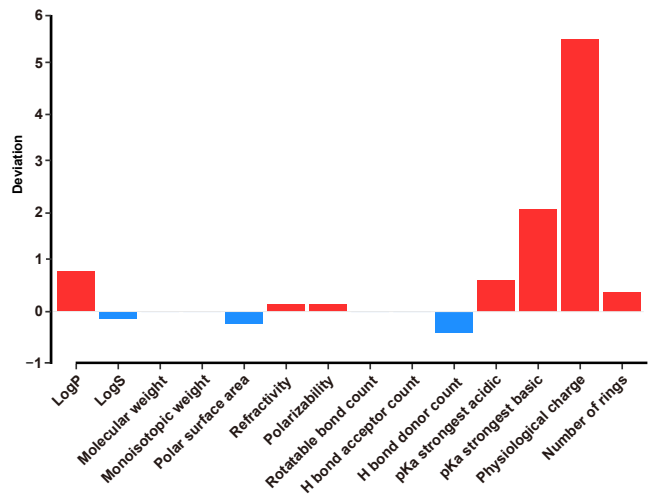

Supplement: mmc6.pdf [file mmc6.pdf]
